# Supplementary material for: Influence of the hydrophobic domain on the self-assembly and hydrogen bonding of hydroxy-amphiphiles
Source: Royal Society of Chemistry journal article supplement (doi:10.1039/c9cp01475f), 2019-01-01
Supplement: c9cp01475f1.pdf [file c9cp01475f1.pdf]

*Electronic Supplementary Information*

## **Influence of the Hydrophobic Domain on the Self-Assembly and Hydrogen Bonding of Hydroxy-Amphiphiles**

Valery Andrushchenko\* and Walter Pohle\*

### **Content**

#### **Computational procedures**

**Table S1.** Peak wavenumbers of the  $\nu$ OH bands for different alcohols.

**Table S2.** Main geometrical parameters for optimized methanol models and vibrational assignments in the  $\nu$ OH region.

**Table S3.** Atomic charges for a *trans* (**t**) ODA conformer.

**Table S4.** Atomic charges for a *gauche* (**g**) ODA conformer.

**Table S5.** Atomic charges for a DOG molecule.

**Figure S1.** XRD patterns obtained for ODA films.

**Figure S2.** Displacements of the vibrations due to the  $\nu$ OH normal mode in methanol models.

**Figure S3.** Schematic representation of in-phase and out-of-phase coupling due to the  $\nu$ OH mode.

**Figure S4.** Calculated IR spectra in the  $\nu$ OH region for different methanol models (MA)<sub>n</sub>.

**Figure S5.** Calculated integral intensity of the  $\nu$ OH band.

**Figure S6.** Magnitude of the calculated static dipole moment.

**Figure S7.** Displacements of the vibrations due to the  $\nu$ OH normal mode in ethanol models.

**Figure S8.** Representation of 9 PBC cells for the MD simulations of ODA systems.

**Figure S9.** RMSD plots of the MD simulations of (ODA)<sub>98</sub> and (DOG)<sub>10</sub>.

**Figure S10.** Summarized and digitized literature data for  $\nu$ (OH) vs  $r$ (O...O).

**Figure S11.** Starting structures for the MD simulations of the hydration of the (ODA)<sub>98</sub> bilayer.

**Figure S12.** Schematic representation of averaging steps for generation of the computed (DOG)<sub>10</sub> spectra.

**Figure S13.** Comparison of the hydration of (ODA)<sub>98</sub> and (DOG)<sub>60</sub>.

#### **References**

## Computational procedures

### *Octadecanol computations*

Starting geometries. An initial geometry of ODA (Figure 1) was obtained from the Human Metabolome Database.<sup>1</sup> The initial geometries for methanol (MA), ethanol (EA), butanol (BA), decanol (DA), and their assemblies, as well as the starting structures for the MD simulations were generated with the aid of MCM software.<sup>2</sup> The initial geometries for the structures of the assemblies were created according to the XRD data of Abrahamsson *et al.*<sup>3</sup> to meet the prerequisites for hydrogen-bond (H-bond) formation between the monolayers. For the quantum-mechanical (QM) and semi-empirical calculations of the model bilayers, one of the monolayers was constituted of trans conformers of the alcohol, while the other one was constituted of *gauche* conformers. The geometries of the longer systems (MA)<sub>40</sub>, (EA)<sub>40</sub> and (MA)<sub>200</sub> were obtained by propagating (MA)<sub>10</sub> or (EA)<sub>10</sub> four or 20 times, respectively. Furthermore, (EA)<sub>10</sub> and ODA assemblies were also investigated with trans conformers in both monolayers. For the MD simulations of ODA each monolayer had 49 molecules (forming a 7×7 lattice) resulting in a total of 98 molecules in the bilayer assembly. Systems with both  $\gamma$ - and  $\beta$ -form structures were generated and subjected to MD simulations.

MD simulations. All MD simulations were done with Amber 9 package<sup>4</sup> using supplied general amber force field (GAFF). Although this force field was not specifically developed for lipid or hydrocarbon applications, several tests suggest its good applicability to such systems, comparable to CHARMM27 and GROMOS.<sup>5-7</sup> Atomic charges were assigned for both trans (**t**) and *gauche* (**g**) ODA conformers using the RESP potential fit method<sup>8</sup> with the aid of *antechamber* module from Amber 9 package and GAUSSIAN 09 software package<sup>9</sup> (Tables S3 and S4).

Periodic boundary conditions (PBC) were used for all the simulations. The size of the single PBC cell was set by *tleap* module of Amber 9 using Van-der-Waals box dimensions. The starting structure consisting of 98 ODA molecules was first subjected to 2500 steps of initial minimization to relax possible bad geometrical contacts (1000 steps with steepest descent and the rest with conjugate gradient algorithms) with a 12 Å cut-off of Lennard-Jones interactions. The initial minimization was followed by the heating of the system from 0 to 295 K in the NVT ensemble for 20 ps and by subsequent equilibration at 295 K in the NPT ensemble for 100 ps. Finally, the 20 ns production run was performed at 295 K in the NPT ensemble. Both equilibration and production steps were done with 10 Å cut-off using Langevin dynamics with the collision frequency  $\gamma=1$  and employing SHAKE algorithm on the hydrogen atoms with a tolerance of  $10^{-5}$  Å and 2 fs time step. The particle mesh Ewald method (PME) was used for handling long-range electrostatic interactions. The resulting PBC box sizes were  $48.6 \times 32.7 \times 29.8$ ;  $48.8 \times 31.7 \times 30.5$  and  $47.5 \times 32.4 \times 29.1$  Å<sup>3</sup> for trans-*gauche* (**tg**) and trans-trans (**tt**) models of  $\gamma$ -form, and for  $\beta$ -form, respectively.

For the simulation of bilayer hydration, the system (ODA)<sub>98</sub> was surrounded by a shell containing either one (representing 10 % hydration level) or 10 (representing full hydration) water molecules per

amphiphile, using *tleap* module of Amber 9 (Figure S11). The TIP3P force field<sup>10</sup> was used for water. Initially, three stages of restrained minimization were done to relax possible bad geometrical contacts between water and ODA molecules. Each stage consisted of 500 steps of minimization with steepest descent algorithm followed by 500 steps of minimization with conjugate gradient algorithm and the ODA atoms fixed with force constants of 80, 40, and 2 kcal/(mol Å<sup>2</sup>) at each stage, respectively. Then unrestrained minimization was performed with 1000 steps of steepest descent and 1500 steps of conjugate gradient algorithms. Hereafter, the system was heated from 0 to 295 K in the NVT ensemble within 20 ps, keeping the ODA atoms fixed with a force constant of 10 kcal/(mol Å<sup>2</sup>). The heating was followed by 100 ps of NPT equilibration at 295 K without any restraints. Finally, the 20 ns production run was performed at 295 K in the NPT ensemble. All other parameters of the simulation were the same as described above for the non-hydrated systems. For the systems with one water molecule per amphiphile, the resulting PBC box sizes were 46.7 × 35.4 × 29.3, 48.0 × 32.7 × 30.9 and 53.2 × 32.0 × 28.1 Å<sup>3</sup> for trans-*gauche* (**tg**) and trans-trans (**tt**) models of  $\gamma$ -form, and for  $\beta$ -form, respectively. The box size for **tg** model with 10 water molecules per amphiphile was 45.2 × 51.3 × 32.9 Å<sup>3</sup>.

QM calculations. All QM calculations were performed with GAUSSIAN 09 software package.<sup>9</sup> The initial structures for MA, (MA)<sub>2</sub>, (MA)<sub>3</sub>, (MA)<sub>10</sub>, EA, (EA)<sub>2</sub>, (EA)<sub>3</sub> and (EA)<sub>10</sub> were optimized in vacuum by an energy minimization with B3LYP functional<sup>11</sup> and the Pople-type 6-31++G\*\* basis set. We consider the vacuum approximation appropriate as the experimental IR data are obtained in dry films. For the optimized structures, harmonic vibrational frequencies and IR intensities were calculated. The anharmonic effects were neglected. Although anharmonic corrections can significantly shift  $\nu$ CH and  $\nu$ OH bands,<sup>12</sup> we supposed that the anharmonic effects are still smaller than the harmonic coupling as long as the bands are well separated. Indeed, as it will be shown below, the harmonic approximation provided the most important spectral features observed experimentally. Frequency scaling was not performed.

For the (MA)<sub>10</sub> and (EA)<sub>10</sub>, a plane symmetry (C<sub>s</sub>) was used as previously applied to ethanol systems.<sup>13</sup> All the other structures were fully optimized without any symmetry restrictions. The larger BA and DA systems were optimized at a semi-empirical PM3 level including the computations of IR frequencies and intensities. In order to obtain the IR spectra of larger hydrogen-bonded systems, which are not applicable to direct QM calculations, the force field and intensity tensors<sup>14-16</sup> of (MA)<sub>40</sub>, (EA)<sub>40</sub> and (MA)<sub>200</sub> were constructed from the (MA)<sub>10</sub> or (EA)<sub>10</sub> fragments, respectively, by applying the Cartesian coordinate transfer (CCT) technique<sup>17, 18</sup>. To generate the spectra with finite bandwidth, the computed line spectra were extracted from the GAUSSIAN 09 output and convoluted with Lorentzian curves with bandwidth of 10 cm<sup>-1</sup> using a set of home-built programs.

### *Dioleoylglycerol computations*

A multi-scale MD/DFT approach<sup>19, 20</sup> accounting for the conformational and dynamic effects was applied to the DOG system.

*MD simulations.* An initial geometry for the DOG molecule (Figure 1) was created using MCM program<sup>2</sup>. Ten DOG molecules ((DOG)<sub>10</sub>) were put randomly inside a cube with 35 Å side dimension (avoiding intermolecular clashing) by means of Packmol program<sup>21</sup> and subjected to 10 ns of Generalized Born (GB) MD run. The GB approach is appropriate for water-depleted DOG with implicit solvent simulating the bulk DOG molecules around the ten explicit ones. Both GB and PBC simulations with different initial arrangement of individual molecules (random, bilayer, micellar) were shown to converge to very similar assembly structures.<sup>22</sup> The ensemble size of (DOG)<sub>10</sub> is considered as realistic resulting from our preceding simulations with (DOG)<sub>6</sub> and (DOG)<sub>60</sub> systems.<sup>22</sup> All MD simulations were done with Amber 9 package<sup>4</sup> using GAFF forcefield. Atomic charges for the DOG molecule were assigned semi-empirically with the help of *antechamber* module from Amber 9 package, which, in this case, makes use of *divcon* program and AM1-BCC (Bond Charge Correction) method for charge calculation (Table S5).<sup>4</sup> Because DOG is very flexible and can exist in multiple configurations, it is more suitable to use the BCC method, computing the average charge without accounting for a particular conformation. The RESP charge fitting would require in this case QM calculations for a very large number of possible DOG configurations. All simulations were done with dielectric constant  $\epsilon=2.0$  (value for carbohydrates approximately representing the bulk DOG molecules), with GB model II<sup>23</sup> employing the Analytical Linearized Poisson-Boltzmann (ALPB) model.<sup>24</sup> This model provides higher accuracy for the treatment of the electrostatic interactions in the case of finite solvent dielectric constants compared to standard GB. Effective electrostatic size (radius) of the molecule was estimated by the *elsize* utility from the Amber 9 package to be 6.94 Å. The constructed ensemble of 10 DOG molecules was first subjected to 2500 steps of initial minimization to relax possible bad geometrical contacts (1000 steps with steepest descent and the rest with conjugate gradient algorithms) with no cut-off. The initial minimization was followed by 20 ps of equilibration with the system heated from 0 to 300 K. The 10 ns production run was performed at 300 K. Both equilibration and production steps were done with a 50 Å cut-off of Lennard-Jones interactions, using Langevin dynamics with the collision frequency  $\gamma=1$  and employing SHAKE algorithm on H atoms with a tolerance of  $10^{-5}$  Å and 2 fs time step. The results of the MD simulations, including the analysis of H-bonds, were treated with the *ptraj* utility from the Amber 9 package. Further analysis of the *ptraj* output was done by a home-built program “Ptraj HBOND”<sup>25</sup>.

The resulting geometries of six random MD snapshots and the lowest potential energy structure were used for further QM calculations. All DOG molecules in the ensemble were classified in two types, which comprise either hydrogen-bonded (inter- or intramolecularly) or free species. A total of 14 free and 8 H-bonded molecules with different H-bond patterns were used for QM calculations. The H-bonded molecules were further classified according to the bonding pattern.

*QM calculations.* For all the molecules, the hydrocarbon tails, less essential in this case, were truncated so that only the capping methyl groups were left. Such a reduction of the molecular size allowed us to perform high-level DFT computations necessary for the correct representation of vibrational frequencies. The molecular fragments were subjected to full DFT optimization and frequency calculations with GAUSSIAN 09 in vacuum at the B3LYP/6-31++G\*\* level. Two H-bonded molecules were considered and computed as one system. Altogether, 22 DFT calculations were done. Since the resulting MD structures were close to the local minima, the geometry of the fragments did not change significantly during the QM optimization procedure.

Infrared spectra were generated for all the fragments from the GAUSSIAN 09 frequency calculation output using Lorentzian bands with a width of  $10\text{ cm}^{-1}$  utilizing a set of home-built programs. Frequency scaling was not performed. The spectra were averaged in three steps as illustrated in Figure S12. First, the spectra of the systems with the same H-bond pattern as well as the spectra of free molecules were time-averaged with equal weight to represent the dynamics of the system. In the second step, the time-averaged spectra for the H-bonded species were weighted according to their relevant occurrence obtained in the course of the MD run (see Table 4, 3<sup>rd</sup> column). And finally, the weighted spectrum of the H-bonded molecules and the averaged spectrum of the free species were again weighted according to their occurrence obtained in the MD run (see Table 4, 2<sup>nd</sup> column). The final result was then compared with the experimental DOG spectrum.

#### ***Detailed analysis of the calculated IR spectra of ethanol models***

The two H-bonded ethanol molecules of (EA)<sub>2</sub> (note that the H donor molecule is in trans conformation while the acceptor is in *gauche* conformation) have two separate bands at 3819 and 3669  $\text{cm}^{-1}$  arising from free (coming from the *gauche* conformer) and H-bonded (from the trans conformer) OH groups, respectively (Figures 4 and S7). The free OH group vibrates at higher frequency compared to the H-bonded one and has a much lower intensity as it was shown before.<sup>26</sup> The presence of the two H-bonds in (EA)<sub>3</sub> leads to coupling of the  $\nu\text{OH}$  vibrations of the H-bonded groups. This results in appearance of two coupled modes at 3592 and 3550  $\text{cm}^{-1}$ , corresponding to out-of-phase and in-phase coupled vibrations, respectively. The dipole moments of these modes are nearly perpendicular to each other (Figure S7). The highest-frequency mode at 3832  $\text{cm}^{-1}$  arises from the free OH group of one of the trans conformers.

The coupling of the  $\nu\text{OH}$  modes of different molecules in (EA)<sub>10</sub> gives rise to several out-of-phase and in-phase vibrations (Figure 4 and Table 2). As for methanol, the splitting into multiple bands can be referred to end effects. Vibrational displacements for the most intense bands at 3585 and 3508  $\text{cm}^{-1}$  are illustrated in Figure S7.

The IR spectrum of (EA)<sub>10</sub> with **tg** conformation of the monomers is largely similar to its counterpart with **tt** conformers (Figure 4). The multiple-split bands converge in the spectrum of (EA)<sub>40</sub> into two main  $\nu\text{OH}$  peaks at 3586 and 3498  $\text{cm}^{-1}$ , corresponding to out-of-phase and in-phase coupled vibrations, respectively (Figures 4 and S7). There is a considerable difference between these latter two

wavenumbers compared to the corresponding values for (MA)<sub>40</sub> by about 85 cm<sup>-1</sup> on average. As in the methanol models, the integral intensity of the H-bonded νOH bands and the magnitude of the static dipole moment linearly increase with the number of H-bonded monomeric units in the system (Figures S5 and S6), suggesting the absence of cooperative effects in the formation of the H-bond network.

The dipole moments of the coupled out-of-phase and in-phase modes are nearly perpendicular to each other for all the studied ethanol systems (Figure S7), as for methanol. The computed geometrical parameters (bond lengths and angles) for (EA)<sub>10</sub> (Table 2) generally agree well with crystal-XRD data.<sup>3</sup> One exception is the O-C-C angle in the *gauche* conformers (113.32°), which is larger than that obtained by XRD (109.18°), whereas that angle is in perfect agreement with experimental data for the *trans* conformer (109.2°). However, the *gauche* conformer has an intrinsically larger value of the O-C-C angle close to 113°, as can be seen for *gauche* EA monomer and the *gauche* conformers in (EA)<sub>2</sub> and (EA)<sub>3</sub> (Table 2) and also from literature data<sup>13</sup>.

**Table S1.** Peak wavenumbers for  $\nu$ OH bands arising from several compounds; values for the films measured in our laboratory were obtained at relative humidity of 0 %.

| <i>Compound</i> <sup>a</sup>     | <i>Physical State</i>        | <i>Wavenumber(s), cm<sup>-1</sup></i> |                   | <i>Reference</i>           |
|----------------------------------|------------------------------|---------------------------------------|-------------------|----------------------------|
| Octadecanol                      | Solution in CCl <sub>4</sub> | 3638                                  |                   | AIST                       |
|                                  | Film                         | 3288 sh                               | 3227              | this paper                 |
|                                  | Film                         | 3285                                  | 3210              | Batishcheva <sup>27</sup>  |
|                                  | Nujol                        | 3311                                  | 3230 <sup>b</sup> | Aldrich                    |
|                                  | Resolidified <sup>c</sup>    | 3330                                  | 3250 sh           | Tasumi <sup>28</sup>       |
| KBr                              | 3380 <sup>b</sup> sh         | 3304                                  | AIST              |                            |
| Eicosanol                        | Nujol                        | 3320 <sup>b</sup> sh                  | 3229              | Aldrich                    |
| Hexadecanol                      | Nujol                        | 3310 <sup>b</sup>                     | 3260 <sup>b</sup> | AIST                       |
| 2-Hexadecanol                    | Nujol                        | 3350 <sup>b</sup>                     | 3300 <sup>b</sup> | AIST                       |
| Tetradecanol                     | Nujol                        | 3300 <sup>b</sup> sh                  | 3230              | AIST                       |
| Tetradecanol                     | Film                         | 3300                                  | 3210              | Batishcheva <sup>27</sup>  |
| Dioleoylglycerol                 | Fluid film                   | 3515                                  | 3465              | this paper                 |
| Oleyl alcohol                    | Neat; liquid film            | 3322; 3332                            |                   | Aldrich; AIST              |
| Heptadecanol                     | Resolidified <sup>c</sup>    | 3300                                  |                   | Tasumi <sup>28</sup>       |
| Hexadecanol                      | Melt                         | 3340                                  |                   | Aldrich                    |
| 2-Hexadecanol                    | Melt                         | 3359                                  |                   | Aldrich                    |
| Dodecanol                        | Nujol                        | 3328                                  |                   | AIST                       |
| Octanol, Hexanol                 | Neat                         | 3329                                  |                   | Aldrich                    |
| 2-Octanol                        | Neat                         | 3345                                  |                   | Aldrich                    |
| Butanol, Ethanol                 | Neat                         | 3333 ± 2                              |                   | Aldrich                    |
| 2-Butanol                        | Neat                         | 3343; 3353                            |                   | Aldrich; AIST              |
| 2-Methyl-2-propanol              | Neat                         | 3362; 3366                            |                   | Aldrich; AIST              |
| Heptanol, Pentanol, Propanol     | Neat                         | 3324 ± 1                              |                   | Aldrich                    |
| 2-Propanol                       | Neat                         | 3342; 3340                            |                   | Aldrich; AIST              |
| Methanol                         | Neat                         | 3336; 3347                            |                   | Eysel <sup>29</sup> ; AIST |
| Methanol                         | Neat                         | 3342                                  |                   | Aldrich                    |
| 22-Hydroxybehe-nylphosphocholine | Film                         | 3290                                  |                   | Pohle <sup>30</sup>        |
| Water                            | Liquid                       | 3390 ± 10                             |                   | own data                   |

<sup>a</sup> Compounds are the primary (n-)alcohols in each case, if not specified otherwise.

<sup>b</sup> These wavenumbers were estimated (rounded to the next decade) from the catalogue spectra (Aldrich<sup>31</sup> and AIST<sup>32</sup>) since the explicit values were not provided there.

<sup>c</sup> Rapidly resolidified after melting.

**Table S2.** Main geometrical parameters for optimized (B3LYP/6-31++G\*\*) methanol models and vibrational assignments in the  $\nu$ OH region; the individual molecules in (MA)<sub>2</sub> and (MA)<sub>3</sub>, structures are labeled with subscript indices as shown in Figure 3 in the main text.

| <i>Fragment</i>                 | <i>Wavenumber, cm<sup>-1</sup></i> | <i>Assignment</i>                                                      | <i>C-O bond length, Å</i> | <i>O-H bond length, Å</i> | <i>O...O distance, Å</i>                    | <i>H-bond length, Å</i>                     | <i>O-H...O angle, °</i>                   |
|---------------------------------|------------------------------------|------------------------------------------------------------------------|---------------------------|---------------------------|---------------------------------------------|---------------------------------------------|-------------------------------------------|
| MA                              | 3839                               | localized $\nu$ OH                                                     | 1.426                     | 0.965                     | -                                           | -                                           | -                                         |
| (MA) <sub>2</sub>               | 3838w                              | localized $\nu$ OH of MA <sub>1</sub> (free)                           | 1.433 (MA <sub>1</sub> )  | 0.966 (MA <sub>1</sub> )  |                                             |                                             |                                           |
|                                 | 3675                               | localized $\nu$ OH of MA <sub>2</sub> (H-bonded)                       | 1.419 (MA <sub>2</sub> )  | 0.974 (MA <sub>2</sub> )  | 2.867                                       | 1.896                                       | 175                                       |
| (MA) <sub>3</sub>               | 3847w                              | localized $\nu$ OH of MA <sub>1</sub> (free)                           | 1.44 (MA <sub>1</sub> )   | 0.965 (MA <sub>1</sub> )  |                                             |                                             |                                           |
|                                 | 3604                               | coupled $\nu$ OH of MA <sub>2</sub> and MA <sub>3</sub> , out of phase | 1.425 (MA <sub>2</sub> )  | 0.979 (MA <sub>2</sub> )  | 2.789 (MA <sub>1</sub> ...MA <sub>2</sub> ) | 1.826 (MA <sub>1</sub> ...MA <sub>2</sub> ) | 167 (MA <sub>1</sub> ...MA <sub>2</sub> ) |
|                                 | 3555                               | coupled $\nu$ OH of MA <sub>2</sub> and MA <sub>3</sub> , in phase     | 1.418 (MA <sub>3</sub> )  | 0.979 (MA <sub>3</sub> )  | 2.797 (MA <sub>2</sub> ...MA <sub>3</sub> ) | 1.836 (MA <sub>2</sub> ...MA <sub>3</sub> ) | 166 (MA <sub>2</sub> ...MA <sub>3</sub> ) |
| (MA) <sub>10</sub>              | 3847w                              | localized $\nu$ OH of the only free OH group                           |                           |                           |                                             |                                             |                                           |
|                                 | 3633m, 3612m, 3535                 | coupled $\nu$ OH, out of phase                                         |                           |                           |                                             |                                             |                                           |
|                                 | 3512m                              | coupled $\nu$ OH, out of phase mixed with in phase                     |                           |                           |                                             |                                             |                                           |
|                                 | 3477m, 3417                        | coupled $\nu$ OH, in phase                                             | 1.422 (av) <sup>a</sup>   | 0.980 (av)                | 2.756 (av)                                  | 1.774 (av)                                  | 180 (av)                                  |
| (MA) <sub>40</sub> <sup>b</sup> | 3847w                              | localized $\nu$ OH of the only free OH group                           |                           |                           |                                             |                                             |                                           |
|                                 | 3521m                              | coupled $\nu$ OH, out of phase                                         |                           |                           |                                             |                                             |                                           |
|                                 | 3401                               | coupled $\nu$ OH, in phase                                             | -                         | -                         | -                                           | -                                           | -                                         |

<sup>a</sup>“(av)” stands for average.

<sup>b</sup>This structure could not be optimized due to large system size.



**Table S3.** Atomic charges for a trans ODA conformer determined with the RESP potential fit method<sup>8</sup>.

| <i>Atom<br/>number</i> | <i>Atom<br/>name</i> | <i>Coordinates</i> |          |          | <i>Charge</i> |
|------------------------|----------------------|--------------------|----------|----------|---------------|
|                        |                      | <i>X</i>           | <i>Y</i> | <i>Z</i> |               |
| 1                      | C                    | 8.424              | -13.598  | 0        | 0.3156        |
| 2                      | C1                   | 7.162              | -12.718  | 0        | 0.0868        |
| 3                      | C2                   | 5.912              | -13.617  | 0        | -0.1174       |
| 4                      | C3                   | 4.65               | -12.737  | 0        | 0.074         |
| 5                      | C4                   | 3.4                | -13.634  | 0        | 0.0935        |
| 6                      | C5                   | 2.137              | -12.756  | 0        | -0.0037       |
| 7                      | C6                   | 0.889              | -13.654  | 0        | 0.0358        |
| 8                      | C7                   | -0.373             | -12.777  | 0        | 0.0608        |
| 9                      | C8                   | -1.622             | -13.676  | 0        | 0.0234        |
| 10                     | C9                   | -2.885             | -12.799  | 0        | 0.038         |
| 11                     | C10                  | -4.133             | -13.699  | 0        | 0.0575        |
| 12                     | C11                  | -5.397             | -12.823  | 0        | 0.015         |
| 13                     | C12                  | -6.644             | -13.725  | 0        | 0.0349        |
| 14                     | C13                  | -7.909             | -12.85   | 0        | 0.0933        |
| 15                     | C14                  | -9.154             | -13.753  | 0        | -0.0185       |
| 16                     | C15                  | -10.421            | -12.879  | 0        | 0.0032        |
| 17                     | C16                  | -11.666            | -13.782  | 0        | 0.1936        |
| 18                     | C17                  | -12.934            | -12.907  | 0        | -0.2823       |
| 19                     | O                    | 9.586              | -12.765  | 0        | -0.741        |
| 20                     | H                    | 8.429              | -14.175  | 0.817    | -0.0348       |
| 21                     | H1                   | 8.429              | -14.176  | -0.816   | -0.0348       |
| 22                     | H2                   | 7.157              | -12.142  | 0.816    | 0.0111        |
| 23                     | H3                   | 7.156              | -12.141  | -0.817   | 0.0111        |
| 24                     | H4                   | 5.916              | -14.194  | -0.817   | 0.0108        |
| 25                     | H5                   | 5.916              | -14.194  | 0.817    | 0.0108        |
| 26                     | H6                   | 4.645              | -12.159  | 0.816    | -0.0265       |
| 27                     | H7                   | 4.645              | -12.16   | -0.817   | -0.0265       |
| 28                     | H8                   | 3.405              | -14.212  | -0.817   | -0.0279       |
| 29                     | H9                   | 3.405              | -14.212  | 0.817    | -0.0279       |
| 30                     | H10                  | 2.134              | -12.178  | 0.818    | -0.0109       |
| 31                     | H11                  | 2.134              | -12.179  | -0.817   | -0.0109       |
| 32                     | H12                  | 0.894              | -14.232  | -0.816   | -0.0196       |
| 33                     | H13                  | 0.894              | -14.232  | 0.816    | -0.0196       |
| 34                     | H14                  | -0.379             | -12.199  | 0.818    | -0.0227       |
| 35                     | H15                  | -0.379             | -12.199  | -0.816   | -0.0227       |
| 36                     | H16                  | -1.617             | -14.253  | -0.817   | -0.0167       |
| 37                     | H17                  | -1.617             | -14.254  | 0.816    | -0.0167       |

|           |     |         |         |        |         |
|-----------|-----|---------|---------|--------|---------|
| <b>38</b> | H18 | -2.891  | -12.222 | 0.818  | -0.0192 |
| <b>39</b> | H19 | -2.891  | -12.221 | -0.816 | -0.0192 |
| <b>40</b> | H20 | -4.127  | -14.276 | -0.816 | -0.0229 |
| <b>41</b> | H21 | -4.127  | -14.276 | 0.816  | -0.0229 |
| <b>42</b> | H22 | -5.402  | -12.245 | 0.817  | -0.0155 |
| <b>43</b> | H23 | -5.403  | -12.246 | -0.817 | -0.0155 |
| <b>44</b> | H24 | -6.638  | -14.302 | -0.816 | -0.0177 |
| <b>45</b> | H25 | -6.638  | -14.302 | 0.817  | -0.0177 |
| <b>46</b> | H26 | -7.916  | -12.273 | 0.817  | -0.0295 |
| <b>47</b> | H27 | -7.915  | -12.273 | -0.816 | -0.0295 |
| <b>48</b> | H28 | -9.147  | -14.33  | -0.816 | -0.0116 |
| <b>49</b> | H29 | -9.147  | -14.33  | 0.817  | -0.0116 |
| <b>50</b> | H30 | -10.426 | -12.302 | 0.817  | -0.0071 |
| <b>51</b> | H31 | -10.426 | -12.301 | -0.817 | -0.0071 |
| <b>52</b> | H32 | -11.66  | -14.359 | -0.817 | -0.0347 |
| <b>53</b> | H33 | -11.659 | -14.359 | 0.816  | -0.0347 |
| <b>54</b> | H34 | -13.744 | -13.494 | 0      | 0.0615  |
| <b>55</b> | H35 | -12.94  | -12.33  | -0.817 | 0.0615  |
| <b>56</b> | H36 | -12.94  | -12.33  | 0.816  | 0.0615  |
| <b>57</b> | H37 | 10.407  | -13.336 | 0      | 0.4438  |

---

**Table S4.** Atomic charges for a *gauche* ODA conformer determined with the RESP potential fit method<sup>8</sup>.

| <i>Atom<br/>number</i> | <i>Atom<br/>name</i> | <i>Coordinates</i> |          |          | <i>Charge</i> |
|------------------------|----------------------|--------------------|----------|----------|---------------|
|                        |                      | <i>X</i>           | <i>Y</i> | <i>Z</i> |               |
| 1                      | C                    | 13.047             | -13.893  | 0        | 0.368         |
| 2                      | C1                   | 14.325             | -14.722  | 0        | -0.1269       |
| 3                      | C2                   | 15.593             | -13.867  | 0        | -0.0322       |
| 4                      | C3                   | 16.877             | -14.697  | 0        | 0.1443        |
| 5                      | C4                   | 18.147             | -13.844  | 0        | 0.0192        |
| 6                      | C5                   | 19.432             | -14.673  | 0        | 0.0035        |
| 7                      | C6                   | 20.702             | -13.82   | 0        | 0.0645        |
| 8                      | C7                   | 21.988             | -14.648  | 0        | 0.0408        |
| 9                      | C8                   | 23.258             | -13.795  | 0        | 0.0204        |
| 10                     | C9                   | 24.544             | -14.624  | 0        | 0.0485        |
| 11                     | C10                  | 25.814             | -13.771  | 0        | 0.0529        |
| 12                     | C11                  | 27.1               | -14.6    | 0        | 0.0129        |
| 13                     | C12                  | 28.37              | -13.747  | 0        | 0.0369        |
| 14                     | C13                  | 29.656             | -14.575  | 0        | 0.0942        |
| 15                     | C14                  | 30.926             | -13.722  | 0        | -0.0201       |
| 16                     | C15                  | 32.212             | -14.551  | 0        | 0.0043        |
| 17                     | C16                  | 33.483             | -13.699  | 0        | 0.1931        |
| 18                     | C17                  | 34.763             | -14.534  | 0        | -0.2828       |
| 19                     | O                    | 11.881             | -14.68   | 0        | -0.7091       |
| 20                     | H                    | 13.024             | -13.25   | 0.875    | -0.0089       |
| 21                     | H1                   | 13.024             | -13.25   | -0.875   | -0.0089       |
| 22                     | H2                   | 14.322             | -15.371  | 0.875    | 0.0302        |
| 23                     | H3                   | 14.322             | -15.371  | -0.875   | 0.0302        |
| 24                     | H4                   | 15.586             | -13.214  | -0.871   | -0.0029       |
| 25                     | H5                   | 15.586             | -13.214  | 0.871    | -0.0029       |
| 26                     | H6                   | 16.883             | -15.35   | 0.871    | -0.0371       |
| 27                     | H7                   | 16.883             | -15.35   | -0.871   | -0.0371       |
| 28                     | H8                   | 18.14              | -13.19   | -0.871   | -0.0138       |
| 29                     | H9                   | 18.14              | -13.19   | 0.871    | -0.0138       |
| 30                     | H10                  | 19.439             | -15.326  | 0.871    | -0.0134       |
| 31                     | H11                  | 19.439             | -15.326  | -0.871   | -0.0134       |
| 32                     | H12                  | 20.696             | -13.166  | -0.871   | -0.0229       |
| 33                     | H13                  | 20.696             | -13.166  | 0.871    | -0.0229       |
| 34                     | H14                  | 21.994             | -15.302  | 0.871    | -0.019        |
| 35                     | H15                  | 21.994             | -15.302  | -0.871   | -0.019        |
| 36                     | H16                  | 23.252             | -13.142  | -0.871   | -0.0163       |
| 37                     | H17                  | 23.252             | -13.142  | 0.871    | -0.0163       |

|           |     |        |         |        |         |
|-----------|-----|--------|---------|--------|---------|
| <b>38</b> | H18 | 24.55  | -15.278 | 0.871  | -0.0209 |
| <b>39</b> | H19 | 24.55  | -15.278 | -0.871 | -0.0209 |
| <b>40</b> | H20 | 25.808 | -13.117 | -0.871 | -0.0218 |
| <b>41</b> | H21 | 25.808 | -13.117 | 0.871  | -0.0218 |
| <b>42</b> | H22 | 27.106 | -15.253 | 0.871  | -0.0153 |
| <b>43</b> | H23 | 27.106 | -15.253 | -0.871 | -0.0153 |
| <b>44</b> | H24 | 28.364 | -13.093 | -0.871 | -0.0179 |
| <b>45</b> | H25 | 28.364 | -13.093 | 0.871  | -0.0179 |
| <b>46</b> | H26 | 29.662 | -15.229 | 0.871  | -0.0296 |
| <b>47</b> | H27 | 29.662 | -15.229 | -0.871 | -0.0296 |
| <b>48</b> | H28 | 30.92  | -13.069 | -0.871 | -0.0114 |
| <b>49</b> | H29 | 30.92  | -13.069 | 0.871  | -0.0114 |
| <b>50</b> | H30 | 32.219 | -15.205 | 0.871  | -0.0073 |
| <b>51</b> | H31 | 32.219 | -15.205 | -0.871 | -0.0073 |
| <b>52</b> | H32 | 33.478 | -13.046 | -0.87  | -0.0344 |
| <b>53</b> | H33 | 33.478 | -13.046 | 0.87   | -0.0344 |
| <b>54</b> | H34 | 35.646 | -13.902 | 0      | 0.0617  |
| <b>55</b> | H35 | 34.814 | -15.173 | -0.877 | 0.0617  |
| <b>56</b> | H36 | 34.814 | -15.173 | 0.877  | 0.0617  |
| <b>57</b> | H37 | 12.106 | -15.598 | 0.002  | 0.4082  |

---

**Table S5.** Atomic charges for a DOG molecule determined with *divcon* program using AM1-BCC semi-empirical method<sup>4</sup>.

| <i>Atom<br/>number</i> | <i>Atom<br/>name</i> | <i>Coordinates</i> |          |          | <i>Charge</i> |
|------------------------|----------------------|--------------------|----------|----------|---------------|
|                        |                      | <i>X</i>           | <i>Y</i> | <i>Z</i> |               |
| 1                      | O1                   | 15.816             | 21.758   | 21.992   | -0.4365       |
| 2                      | O2                   | 14.051             | 19.45    | 22.845   | -0.4386       |
| 3                      | O3                   | 15.863             | 23.933   | 21.31    | -0.5625       |
| 4                      | O4                   | 13.638             | 17.465   | 21.811   | -0.5415       |
| 5                      | O5                   | 13.441             | 23.731   | 22.422   | -0.607        |
| 6                      | C6                   | 17.942             | 22.22    | 25.092   | -0.0856       |
| 7                      | C7                   | 17.287             | 22.023   | 26.495   | -0.0802       |
| 8                      | C8                   | 12.329             | 19.295   | 26.102   | -0.0808       |
| 9                      | C9                   | 11.384             | 20.494   | 26.247   | -0.0794       |
| 10                     | C10                  | 18.247             | 23.021   | 32.173   | -0.0804       |
| 11                     | C11                  | 16.799             | 22.697   | 32.669   | -0.0793       |
| 12                     | C12                  | 15.037             | 25.819   | 27.918   | -0.0846       |
| 13                     | C13                  | 15.12              | 25.71    | 26.326   | -0.0794       |
| 14                     | C14                  | 17.77              | 23.653   | 24.601   | -0.0857       |
| 15                     | C15                  | 17.418             | 20.482   | 26.842   | -0.0723       |
| 16                     | C16                  | 11.79              | 18.268   | 25.11    | -0.0833       |
| 17                     | C17                  | 19.285             | 23.607   | 33.174   | -0.0795       |
| 18                     | C18                  | 11.939             | 21.558   | 27.204   | -0.0745       |
| 19                     | C19                  | 16.193             | 26.697   | 28.482   | -0.0786       |
| 20                     | C20                  | 16.037             | 21.737   | 31.751   | -0.0731       |
| 21                     | C21                  | 14.034             | 24.858   | 25.665   | -0.0779       |
| 22                     | C22                  | 18.373             | 23.902   | 23.138   | -0.074        |
| 23                     | C23                  | 17.041             | 20.243   | 28.399   | -0.0507       |
| 24                     | C24                  | 12.721             | 17.105   | 24.959   | -0.0749       |
| 25                     | C25                  | 20.522             | 24.065   | 32.538   | -0.08         |
| 26                     | C26                  | 16.604             | 26.376   | 29.925   | -0.0812       |
| 27                     | C27                  | 11.128             | 22.838   | 27.258   | -0.0449       |
| 28                     | C28                  | 15.763             | 22.333   | 30.365   | -0.0517       |
| 29                     | C29                  | 12.658             | 25.382   | 25.911   | -0.0481       |
| 30                     | C30                  | 17.883             | 22.937   | 21.991   | -0.1272       |
| 31                     | C31                  | 21.437             | 24.819   | 33.46    | -0.0801       |
| 32                     | C32                  | 17.66              | 27.386   | 30.51    | -0.0789       |
| 33                     | C33                  | 14.024             | 17.411   | 24.159   | -0.1269       |
| 34                     | C34                  | 15.52              | 20.405   | 28.679   | -0.1709       |
| 35                     | C35                  | 15.02              | 21.249   | 29.564   | -0.1698       |
| 36                     | C36                  | 10.961             | 23.427   | 25.906   | -0.1782       |

|    |     |        |        |        |         |
|----|-----|--------|--------|--------|---------|
| 37 | C37 | 11.583 | 24.457 | 25.322 | -0.1614 |
| 38 | C38 | 16.438 | 22.912 | 21.727 | 0.6438  |
| 39 | C39 | 14.348 | 21.635 | 21.78  | 0.107   |
| 40 | C40 | 22.685 | 25.432 | 32.791 | -0.0926 |
| 41 | C41 | 19.009 | 27.369 | 29.775 | -0.0938 |
| 42 | C42 | 13.89  | 18.105 | 22.823 | 0.6364  |
| 43 | C43 | 13.963 | 20.148 | 21.598 | 0.1411  |
| 44 | C44 | 13.533 | 22.375 | 22.882 | 0.1173  |
| 45 | H45 | 19.015 | 22.042 | 25.188 | 0.0377  |
| 46 | H46 | 17.485 | 21.471 | 24.442 | 0.051   |
| 47 | H47 | 17.812 | 22.664 | 27.208 | 0.0397  |
| 48 | H48 | 16.255 | 22.375 | 26.463 | 0.0496  |
| 49 | H49 | 13.339 | 19.608 | 25.826 | 0.0411  |
| 50 | H50 | 12.382 | 18.85  | 27.098 | 0.0388  |
| 51 | H51 | 11.214 | 20.973 | 25.281 | 0.048   |
| 52 | H52 | 10.395 | 20.145 | 26.55  | 0.0389  |
| 53 | H53 | 18.732 | 22.074 | 31.925 | 0.0393  |
| 54 | H54 | 18.143 | 23.791 | 31.405 | 0.0402  |
| 55 | H55 | 16.936 | 22.162 | 33.611 | 0.0398  |
| 56 | H56 | 16.178 | 23.572 | 32.869 | 0.0406  |
| 57 | H57 | 14.043 | 26.159 | 28.215 | 0.0406  |
| 58 | H58 | 15.107 | 24.851 | 28.419 | 0.0451  |
| 59 | H59 | 15.099 | 26.729 | 25.934 | 0.0406  |
| 60 | H60 | 16.084 | 25.254 | 26.09  | 0.036   |
| 61 | H61 | 16.725 | 23.824 | 24.338 | 0.0463  |
| 62 | H62 | 18.085 | 24.422 | 25.31  | 0.048   |
| 63 | H63 | 16.656 | 19.919 | 26.298 | 0.0381  |
| 64 | H64 | 18.407 | 20.061 | 26.654 | 0.0382  |
| 65 | H65 | 10.862 | 17.806 | 25.453 | 0.0464  |
| 66 | H66 | 11.547 | 18.826 | 24.204 | 0.047   |
| 67 | H67 | 18.787 | 24.506 | 33.544 | 0.0401  |
| 68 | H68 | 19.415 | 22.854 | 33.953 | 0.0396  |
| 69 | H69 | 11.9   | 21.109 | 28.198 | 0.0351  |
| 70 | H70 | 12.981 | 21.777 | 26.959 | 0.045   |
| 71 | H71 | 17.086 | 26.572 | 27.866 | 0.0379  |
| 72 | H72 | 15.883 | 27.728 | 28.293 | 0.0394  |
| 73 | H73 | 16.69  | 20.887 | 31.543 | 0.0424  |
| 74 | H74 | 15.163 | 21.259 | 32.197 | 0.0414  |
| 75 | H75 | 14.279 | 24.781 | 24.603 | 0.0478  |
| 76 | H76 | 14.071 | 23.823 | 26.012 | 0.0396  |
| 77 | H77 | 18.077 | 24.887 | 22.771 | 0.0581  |

|            |      |        |        |        |        |
|------------|------|--------|--------|--------|--------|
| <b>78</b>  | H78  | 19.465 | 23.885 | 23.161 | 0.0518 |
| <b>79</b>  | H79  | 17.274 | 19.194 | 28.597 | 0.0464 |
| <b>80</b>  | H80  | 17.618 | 20.973 | 28.969 | 0.0489 |
| <b>81</b>  | H81  | 13.071 | 16.8   | 25.947 | 0.0522 |
| <b>82</b>  | H82  | 12.159 | 16.31  | 24.465 | 0.0575 |
| <b>83</b>  | H83  | 21.109 | 23.18  | 32.283 | 0.0391 |
| <b>84</b>  | H84  | 20.323 | 24.622 | 31.622 | 0.0395 |
| <b>85</b>  | H85  | 15.738 | 26.475 | 30.583 | 0.0376 |
| <b>86</b>  | H86  | 17.013 | 25.366 | 30.003 | 0.0412 |
| <b>87</b>  | H87  | 10.162 | 22.73  | 27.754 | 0.0413 |
| <b>88</b>  | H88  | 11.654 | 23.551 | 27.898 | 0.0433 |
| <b>89</b>  | H89  | 15.032 | 23.13  | 30.518 | 0.0459 |
| <b>90</b>  | H90  | 16.701 | 22.681 | 29.927 | 0.0473 |
| <b>91</b>  | H91  | 12.422 | 25.425 | 26.976 | 0.042  |
| <b>92</b>  | H92  | 12.529 | 26.398 | 25.535 | 0.0472 |
| <b>93</b>  | H93  | 18.312 | 23.196 | 21.021 | 0.0793 |
| <b>94</b>  | H94  | 18.157 | 21.884 | 22.095 | 0.0808 |
| <b>95</b>  | H95  | 20.858 | 25.61  | 33.943 | 0.0388 |
| <b>96</b>  | H96  | 21.733 | 24.104 | 34.23  | 0.0386 |
| <b>97</b>  | H97  | 17.286 | 28.404 | 30.389 | 0.0397 |
| <b>98</b>  | H98  | 17.838 | 27.276 | 31.583 | 0.0369 |
| <b>99</b>  | H99  | 14.614 | 18.053 | 24.817 | 0.0785 |
| <b>100</b> | H100 | 14.605 | 16.5   | 23.994 | 0.0774 |
| <b>101</b> | H101 | 14.86  | 19.886 | 27.987 | 0.1175 |
| <b>102</b> | H102 | 13.941 | 21.354 | 29.492 | 0.119  |
| <b>103</b> | H103 | 10.223 | 22.912 | 25.295 | 0.1165 |
| <b>104</b> | H104 | 11.143 | 24.701 | 24.358 | 0.1321 |
| <b>105</b> | H105 | 14.069 | 21.993 | 20.786 | 0.0845 |
| <b>106</b> | H106 | 22.388 | 26.141 | 32.015 | 0.0323 |
| <b>107</b> | H107 | 23.315 | 24.669 | 32.328 | 0.0323 |
| <b>108</b> | H108 | 23.3   | 25.932 | 33.542 | 0.0328 |
| <b>109</b> | H109 | 19.534 | 26.425 | 29.938 | 0.0327 |
| <b>110</b> | H110 | 19.779 | 28.097 | 30.04  | 0.0319 |
| <b>111</b> | H111 | 18.823 | 27.426 | 28.7   | 0.0324 |
| <b>112</b> | H112 | 14.608 | 19.684 | 20.847 | 0.0737 |
| <b>113</b> | H113 | 12.942 | 20.082 | 21.215 | 0.0639 |
| <b>114</b> | H114 | 14.024 | 22.309 | 23.856 | 0.0444 |
| <b>115</b> | H115 | 12.574 | 21.851 | 22.909 | 0.0833 |
| <b>116</b> | H116 | 14.287 | 24.167 | 22.217 | 0.4223 |

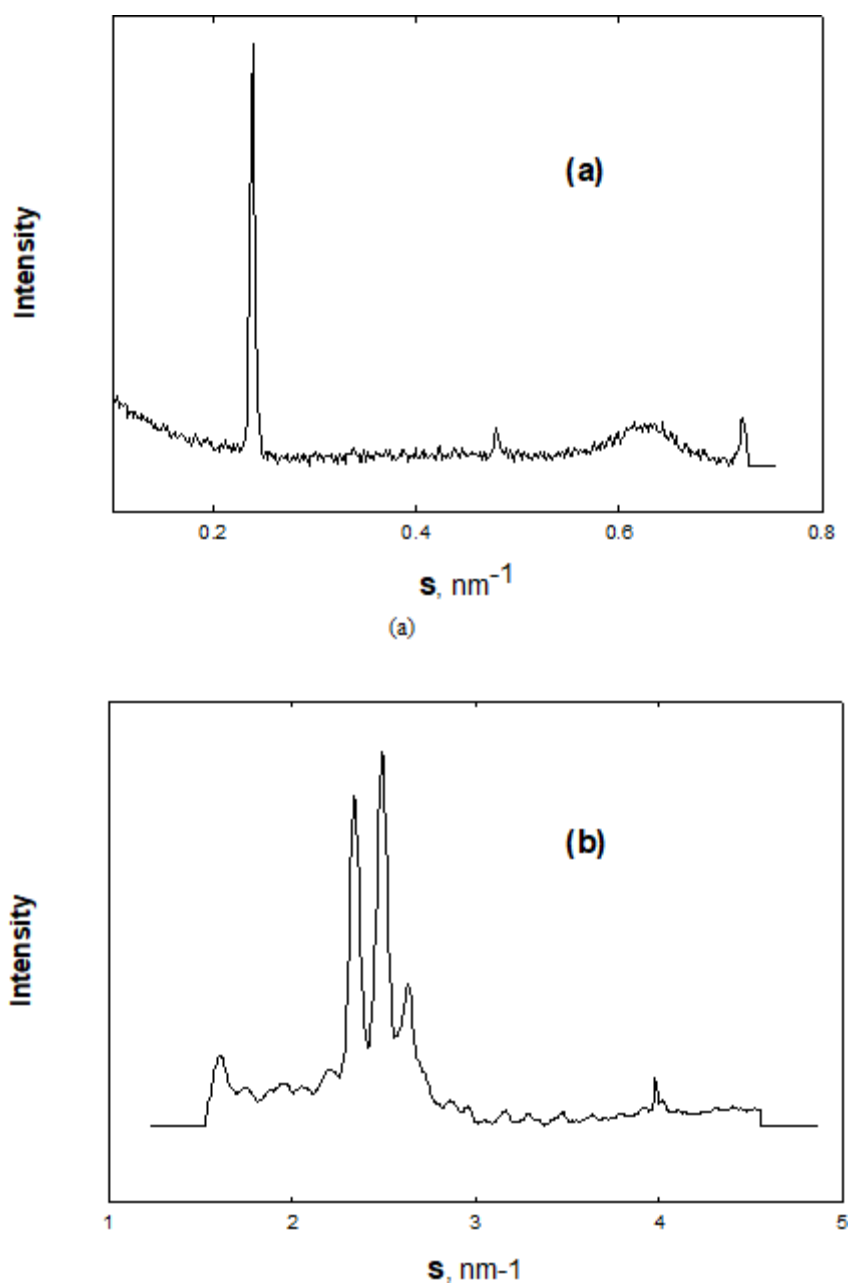

**Figure S1.** XRD patterns obtained for films of ODA at 0 % RH in the small-angle (SAXS, **a**) and wide-angle (WAXS, **b**) scattering regions.



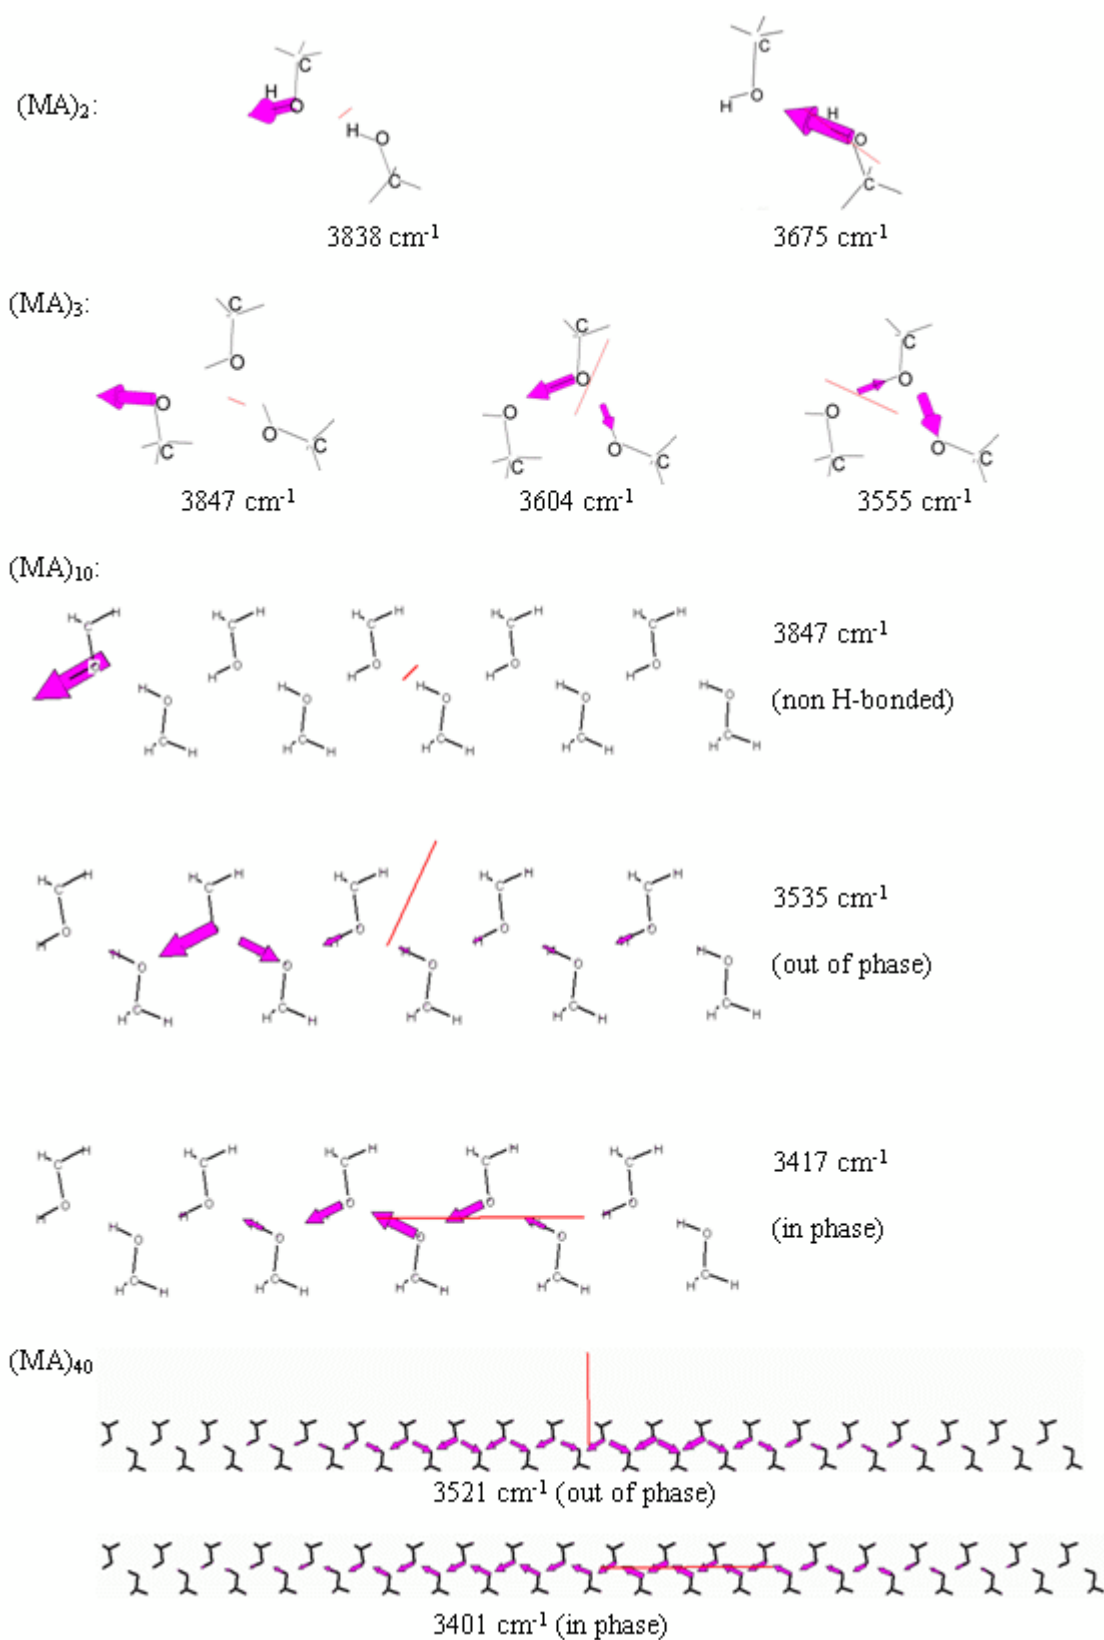

**Figure S2.** Displacements of selected vibrations due to the  $\nu$ OH normal mode (thick magenta arrows) in systems composed of two, three, ten and 40 methanol molecules; the red lines show the directions of resulting O-H transition dipole moments.

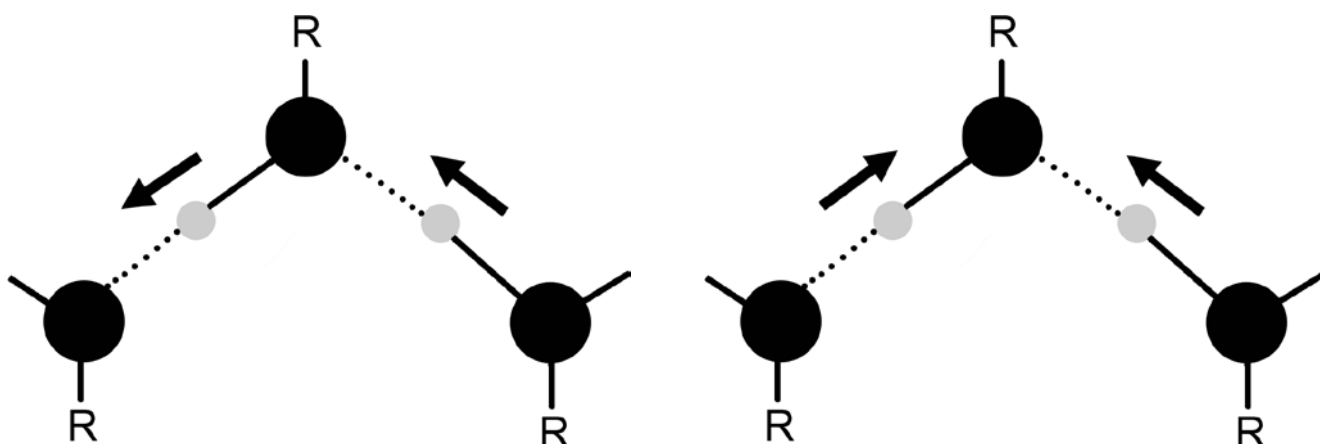

**Figure S3.** Schematic generalized representation of vibrations for the in-phase (left) and out-of-phase (right) coupling due to the  $\nu_{\text{OH}}$  mode as occurring in a string of O-H...O hydrogen bonds; large solid and small grey balls represent oxygen and hydrogen atoms, respectively. In the case of in-phase coupling, O-H bonds of all molecules in the string elongate or shorten simultaneously (all hydrogen atoms in all O-H...O bonds in the string move synchronously in the same direction). In the case of out-of-phase coupling, the O-H bond in one molecule elongates while the O-H bond in the neighboring molecule shortens (hydrogen atoms in neighboring O-H...O bonds move asynchronously, in opposite directions). For an illustration of the longer string of H-bonded molecules see Figure S2.

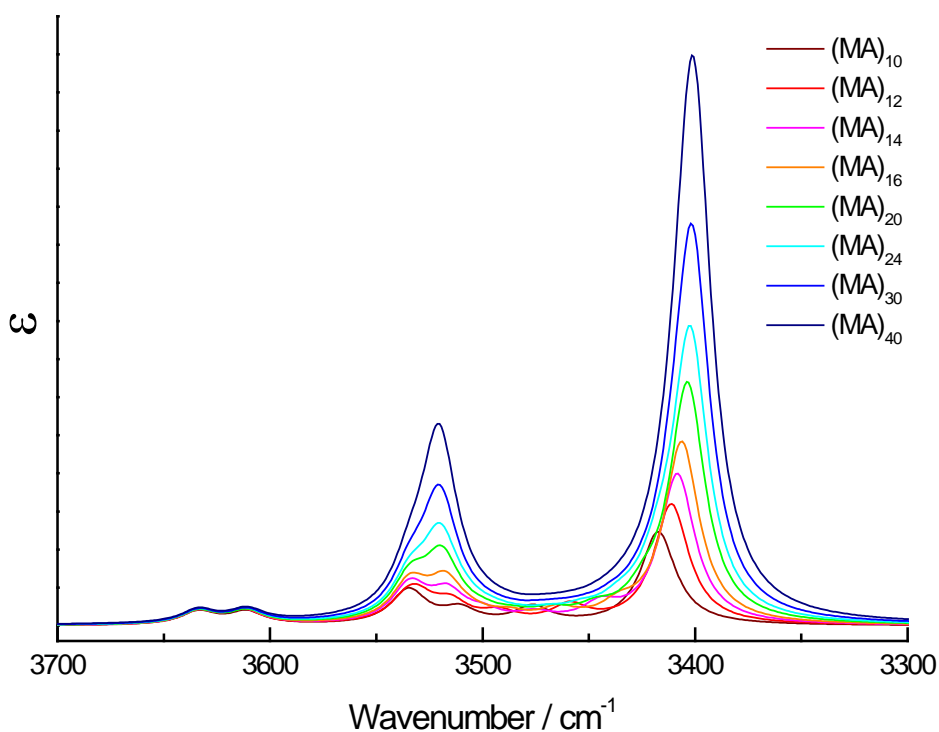

**Figure S4.** IR spectra in the  $\nu_{\text{OH}}$  region calculated with the CCT method for different methanol models  $(\text{MA})_n$ ; spectral intensity is expressed as molar extinction coefficient ( $\epsilon$ ).

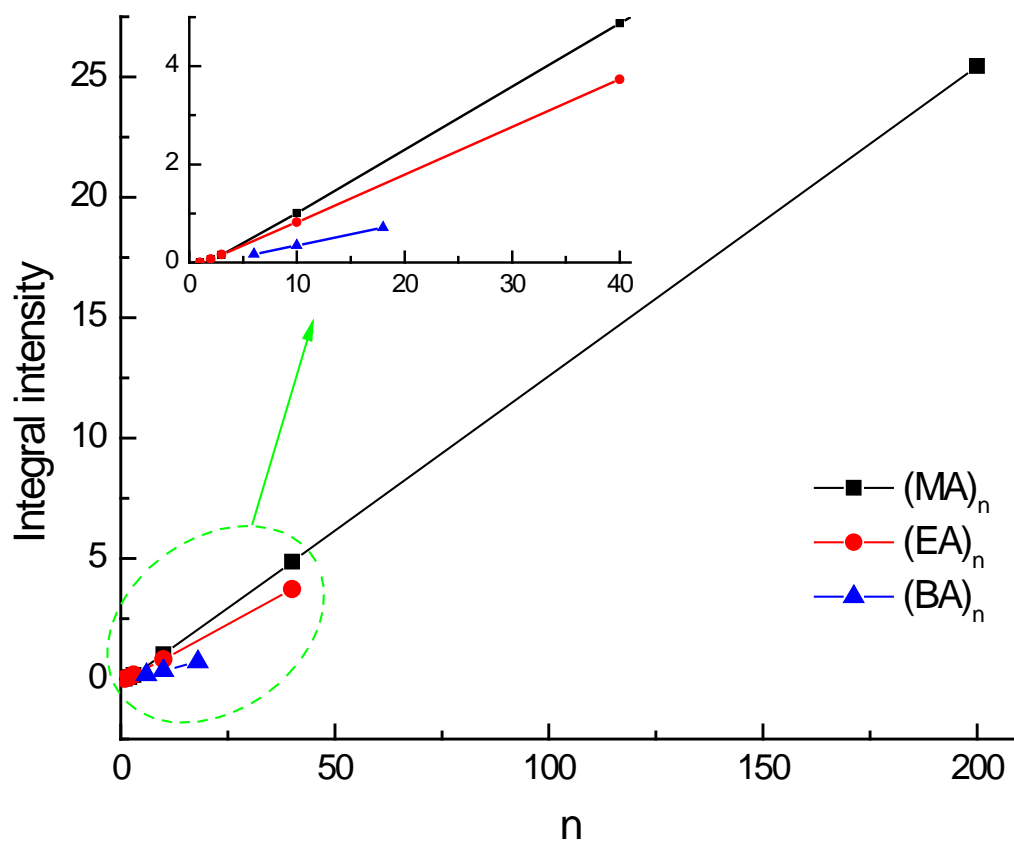

**Figure S5.** Calculated integral intensity of the  $\nu\text{OH}$  band arising from the H-bonded OH groups plotted against the number of the monomeric units ( $n$ ) in methanol ( $(\text{MA})_n$ ), ethanol ( $(\text{EA})_n$ ) and butanol ( $(\text{BA})_n$ ) systems; the calculations were done at B3LYP/6-31++G\*\* level for  $(\text{MA})_n$  and  $(\text{EA})_n$  and at semi-empirical PM3 level for  $(\text{BA})_n$ . The CCT method was used for the systems with 40 and 200 monomeric units. The inset shows expanded scale for X-axis between  $n=0$  and  $n=40$ .

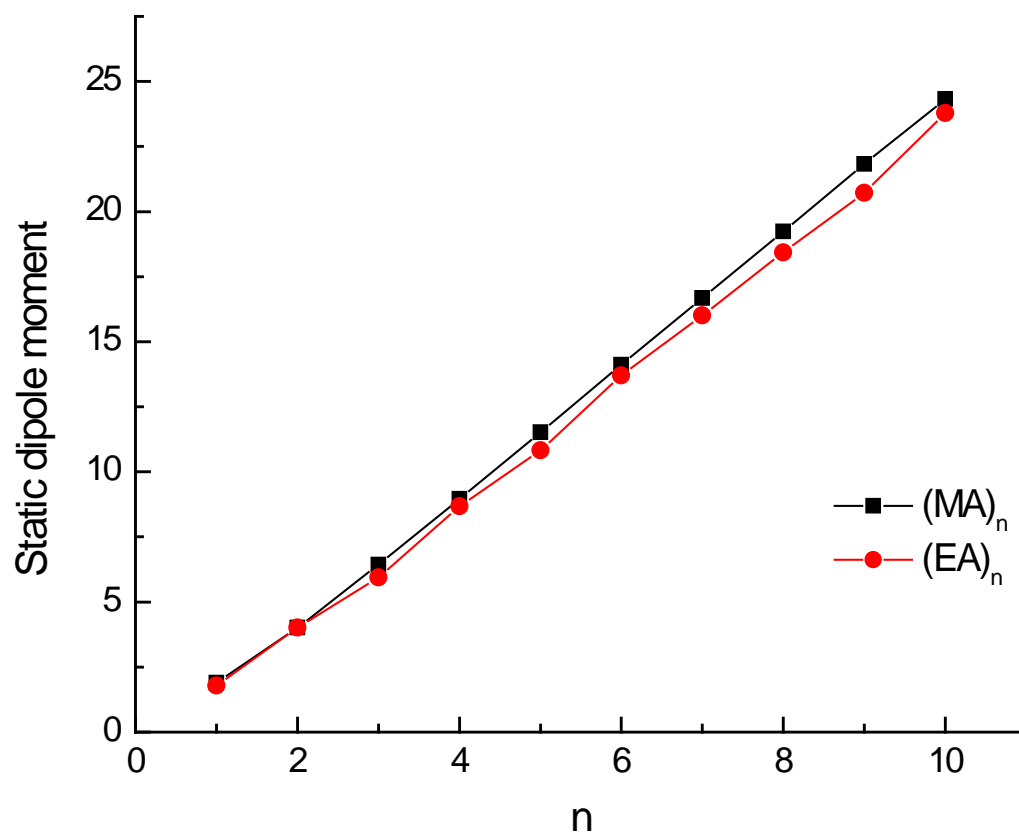

**Figure S6.** Magnitude of the calculated static dipole moment plotted against the number of the monomeric units (**n**) in methanol ((MA)<sub>n</sub>) and ethanol ((EA)<sub>n</sub>) models; the calculations were done at B3LYP/6-31++G\*\* level.

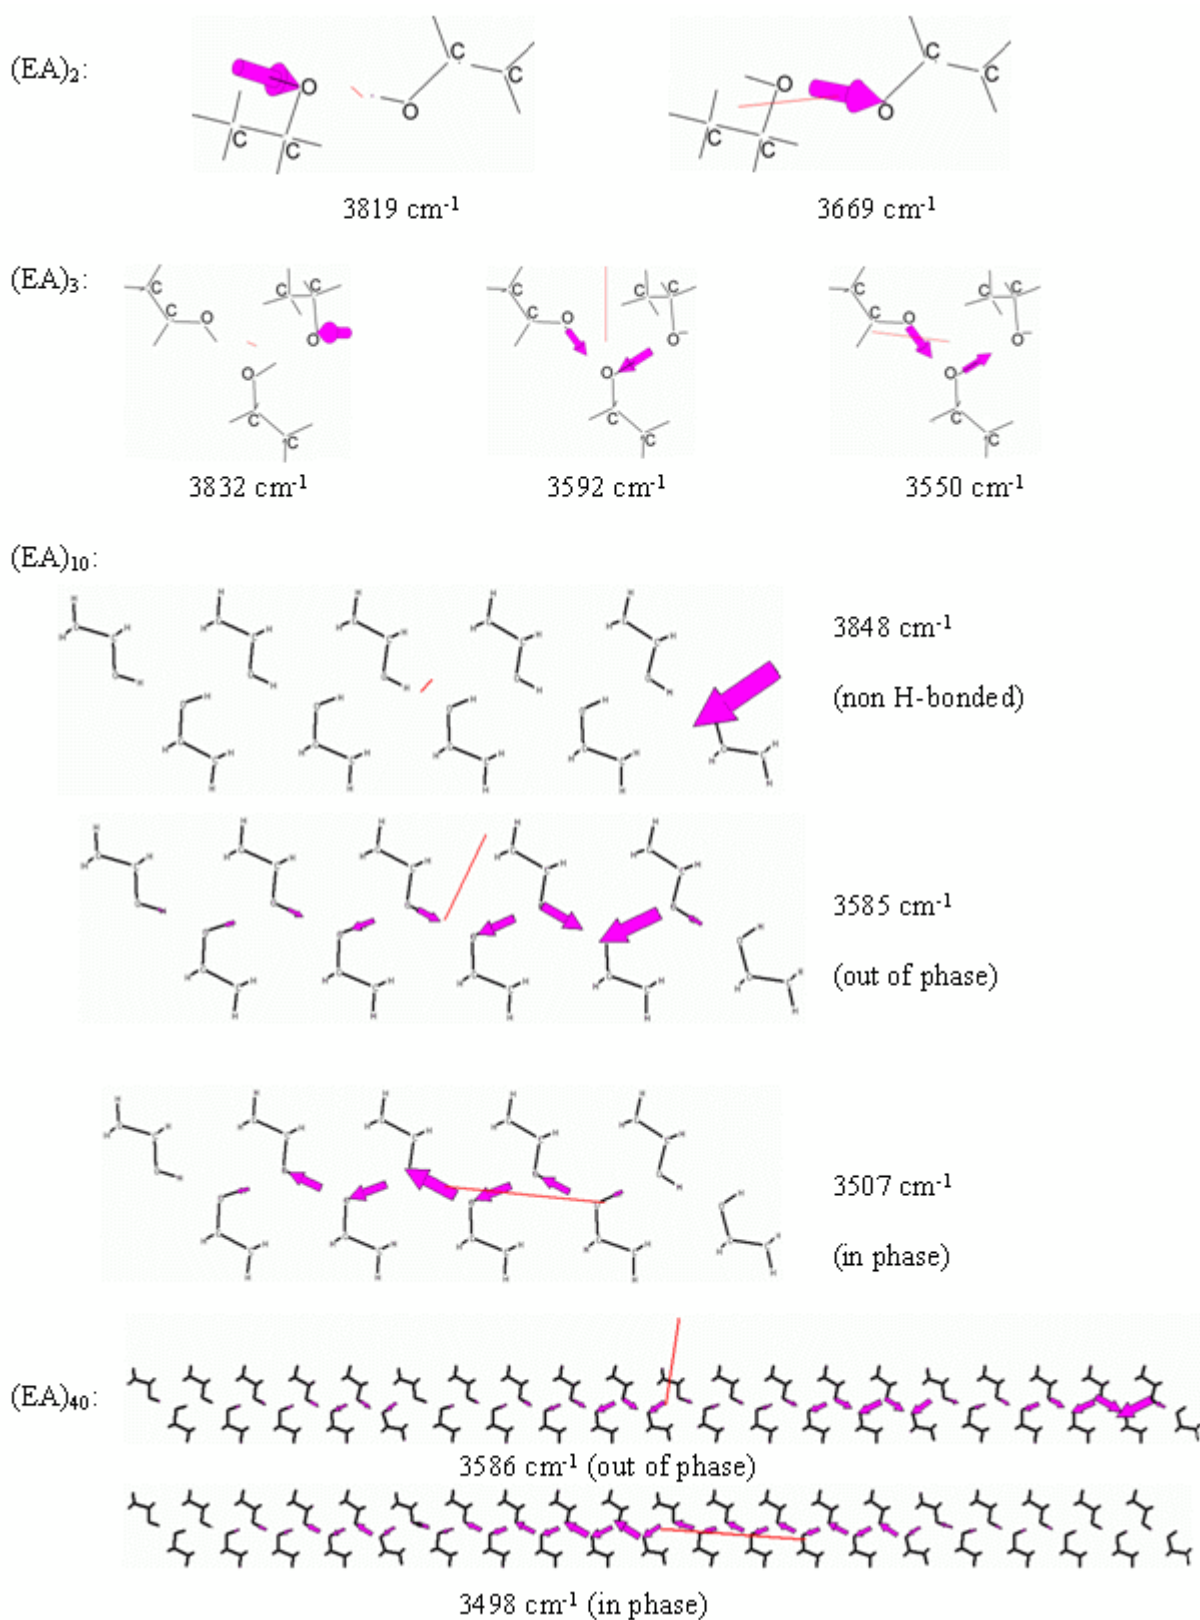

**Figure S7.** Displacements of selected vibrations due to the vOH normal mode (thick magenta arrows) in systems composed of two, three, ten and 40 ethanol molecules; only *trans-gauche* conformation is presented. The red lines show the directions of resulting O-H transition dipole moments.

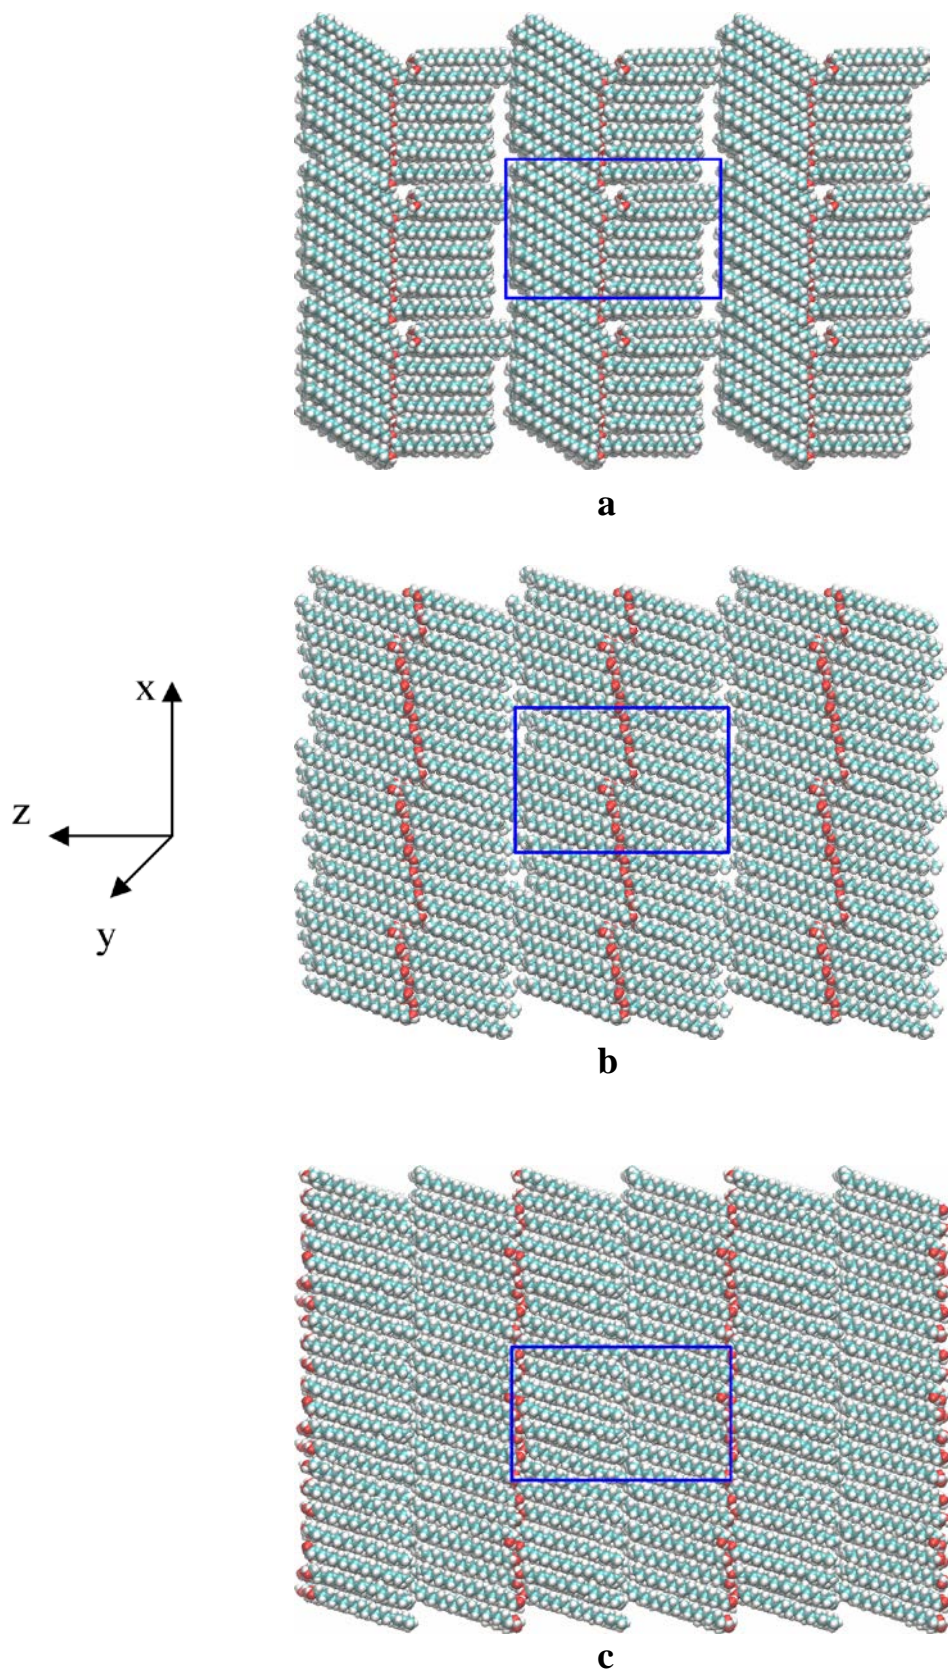

**Figure S8.** Van-der-Waals representation of 9 periodic boundary condition (PBC) cells after 20 ns of MD simulation for trans-trans (a) and trans-gauche (b) models of  $\gamma$ -form, and for  $\beta$ -form (c); the PBC box used in the simulations is marked in blue. The front ( $xz$ ) view is shown for all structures.

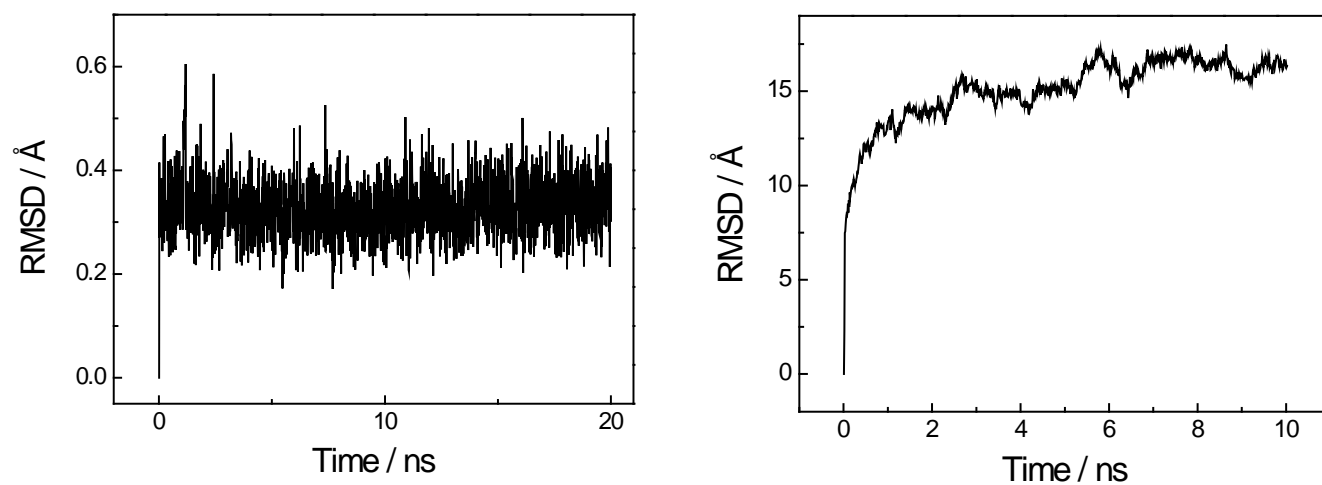

**Figure S9.** RMSD plots for the MD runs for (ODA)<sub>98</sub> *trans-gauche* model of  $\gamma$ -form (left) and (DOG)<sub>10</sub> (right).

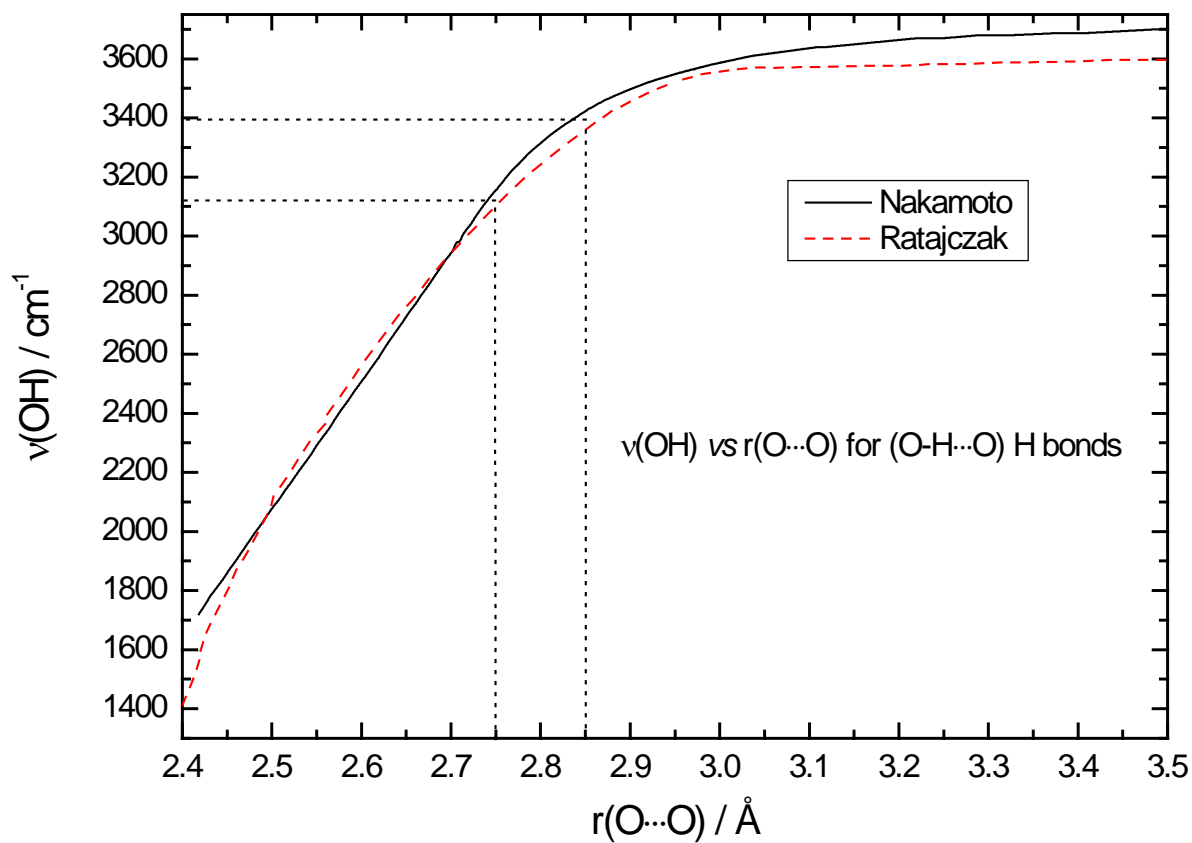

**Figure S10.** Summarized and digitized literature data for  $\nu(\text{OH})$  vs  $r(\text{O}\cdots\text{O})$ .<sup>33, 34</sup> The dotted straight lines show the range of (O...O) distances obtained from the MD data for (ODA)<sub>98</sub> trans-*gauche* model of  $\gamma$ -form and corresponding range of  $\nu(\text{OH})$  vibration wavenumbers.



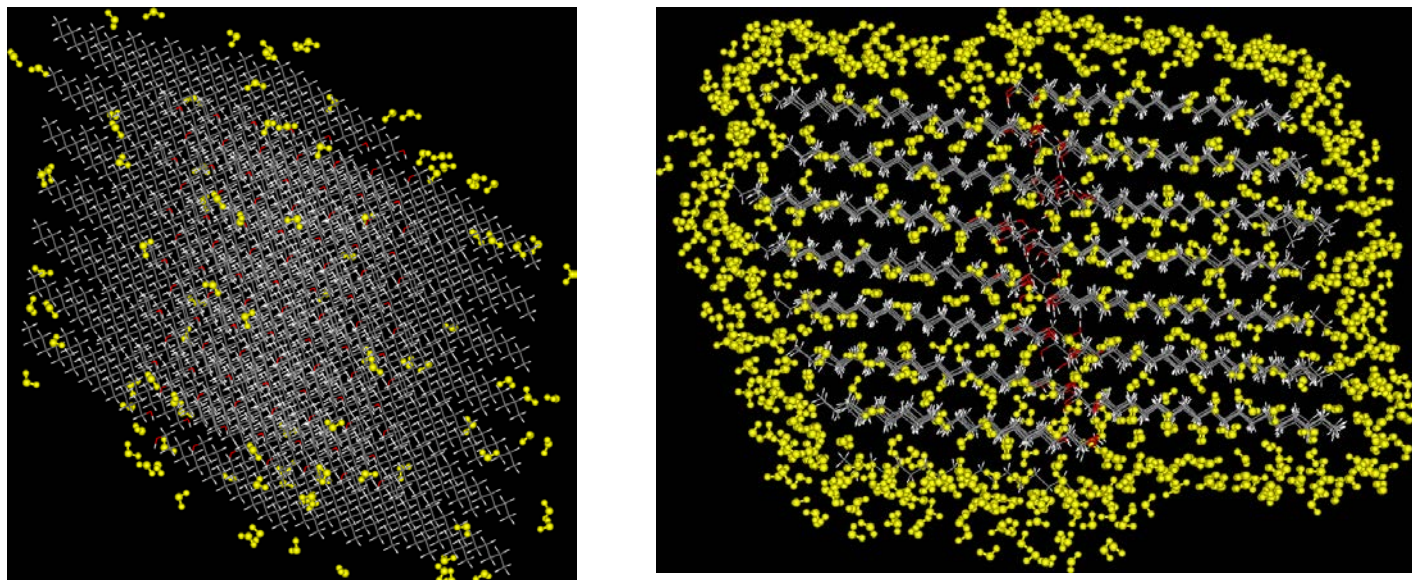

**Figure S11.** Starting structures for the MD simulations of the hydration of (ODA)<sub>98</sub> bilayer in the *trans-gauche* model of  $\gamma$ -form with 1 water molecule (left) and 10 water molecules per amphiphile (fully hydrated system; right).

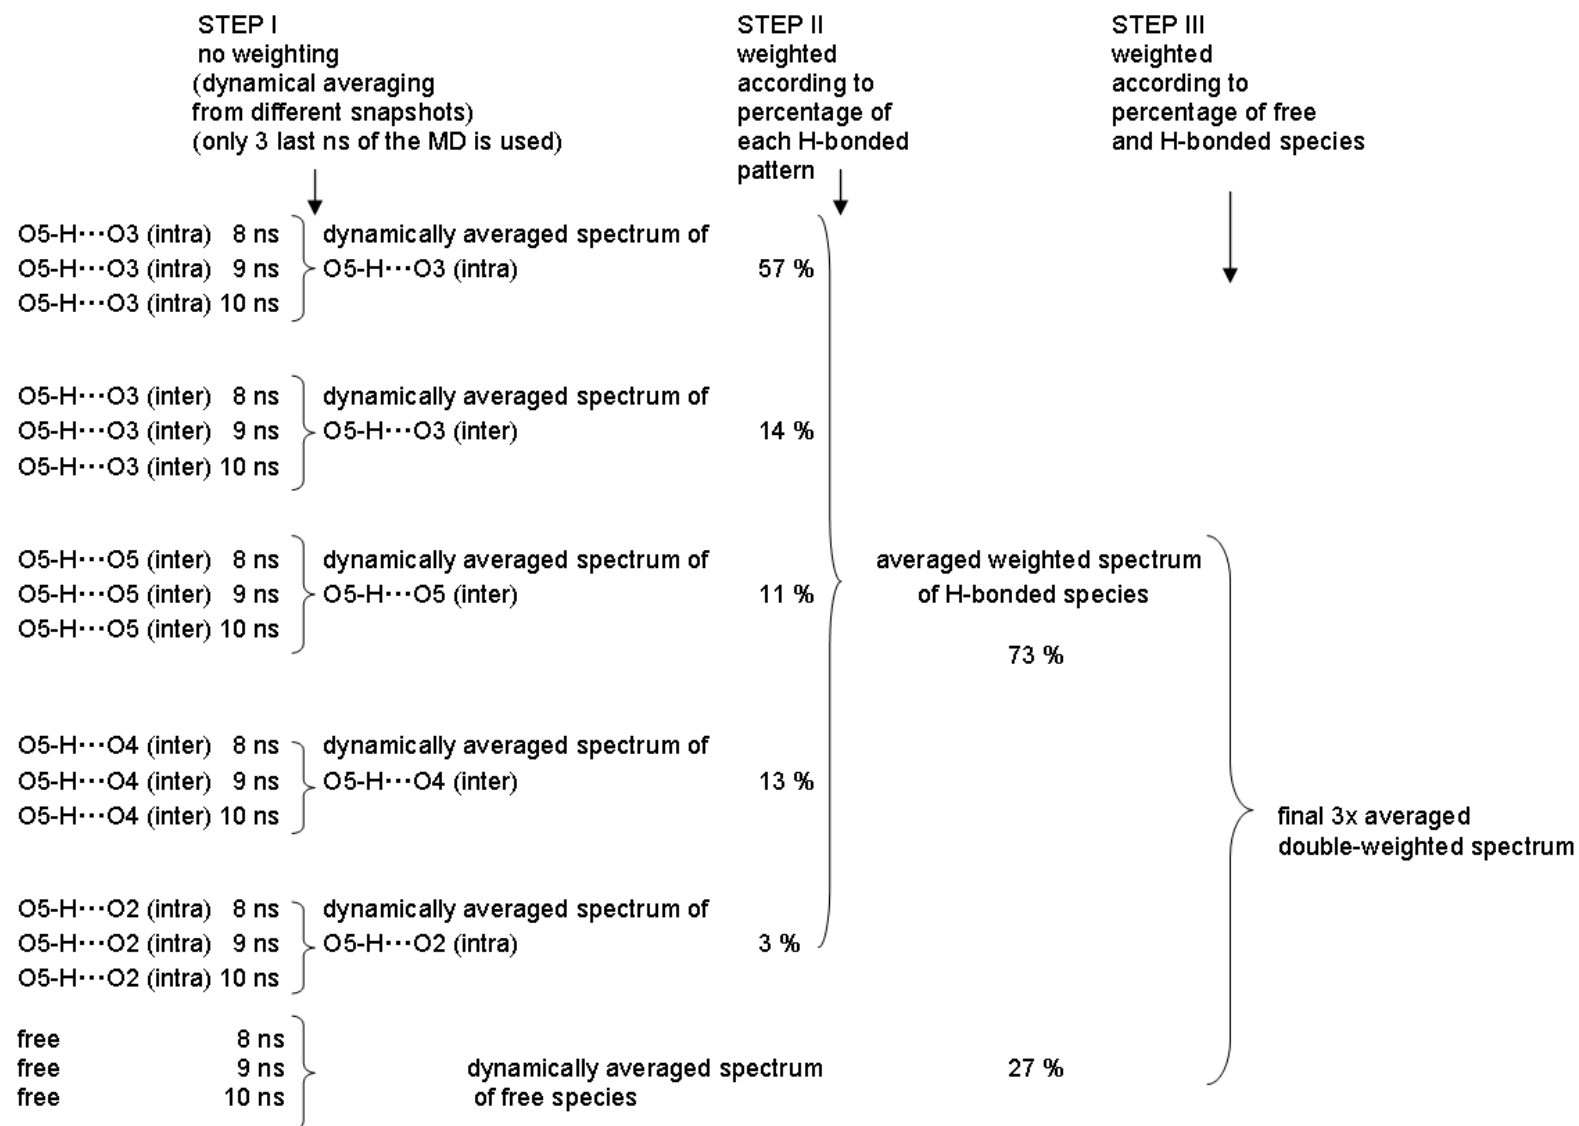

**Figure S12.** Schematic representation of the averaging steps to generate simulated  $(\text{DOG})_{10}$  spectra. The originally computed spectra were averaged in three steps: (i) for each of the 5 H-bond patterns and for the free molecules, the spectra obtained from different randomly chosen snapshots were averaged with equal weight for the last 3 ns of the simulation (8-10ns) to represent the dynamics of the system; (ii) the resulting spectra for all the H-bonded species were weighted according to their relevant percentage populated during the MD run, which provided a spectrum arising from all the H-bonded molecules; (iii) the resulting spectrum of the H-bonded species from the step (ii) along with the resulting spectrum of the free species from the step (i) were again weighted according to the percentage of H-bonded and free molecules. For simplicity, the H-bonded species occurring  $< 2\%$  in step (ii) are not shown but used in the calculations. The final result was compared with the experimental DOG spectrum (see text).

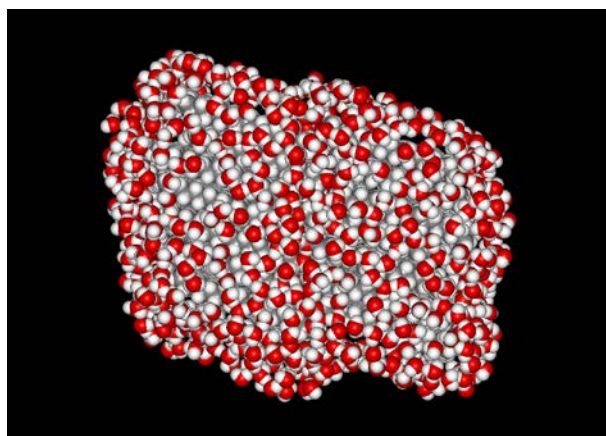**a**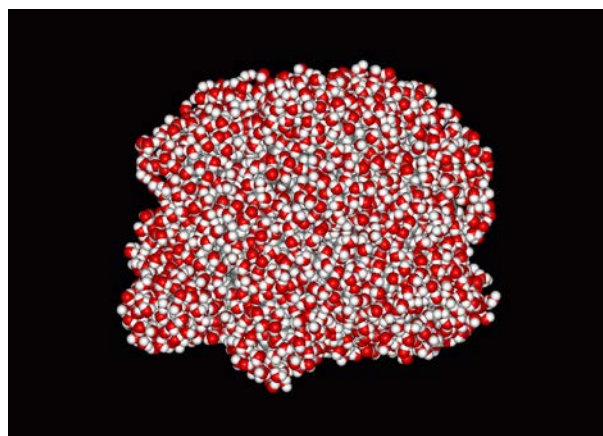**b**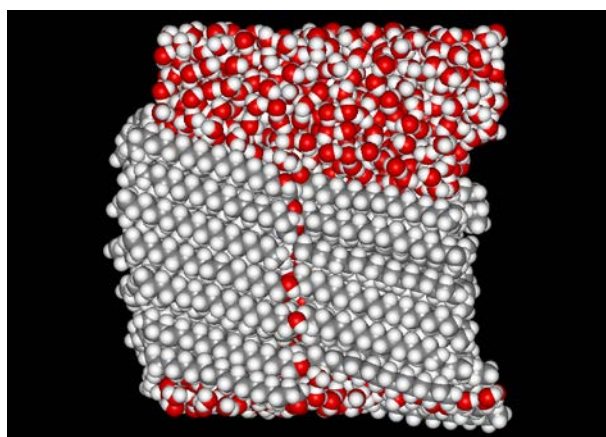**c**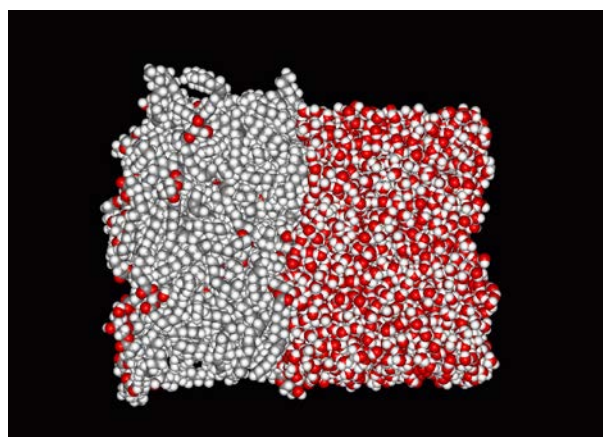**d**

**Figure S13.** Comparison of the hydration of (ODA)<sub>98</sub> (left) and (DOG)<sub>60</sub> (right)<sup>22</sup> assemblies obtained from the MD simulations; fully hydrated systems (obtained by adding 10 water molecules per ODA and 40 water molecules per DOG amphiphile) were used. Starting geometries are shown in panels (a) and (b). The snapshots after 5 ns of MD simulations under periodic boundary conditions are shown in panels (c) and (d).

## References

1. D. S. Wishart, D. Tzur, C. Knox, R. Eisner, A. C. Guo, N. Young, D. Cheng, K. Jewell, D. Arndt, D. Sawhney, C. Fung, L. Nikolai, M. Lewis, M. Coutouly, I. Forsythe, P. Tang, S. Shrivastava, K. Jeroncic, P. Stothard, G. Amegbey, D. Block, D. D. Hau, J. Wagner, J. Miniaci, M. Clements, M. Gebremedhin, N. Guo, Y. Zhang, G. E. Duggan, G. D. MacInnis, A. M. Weljie, R. Dowlatabadi, F. Bamforth, D. Clive, R. Greiner, L. Li, T. Marrie, B. D. Sykes, H. J. Vogel and L. Querengesser, *Nucleic Acids Res.*, 2007, **35**, D521–D526.
2. P. Bouř and P. Maloň, *MCM Molecular Graphics*, Academy of Sciences: Prague, 1995-2011.
3. S. Abrahamsson, G. Larsson and E. Vonsydow, *Acta Crystallogr.*, 1960, **13**, 770-774.
4. D. A. Case, T. A. Darden, T. E. Cheatham III, C. L. Simmerling, J. Wang, R. E. Duke, R. Luo, K. M. Merz, D. A. Pearlman, M. Crowley, R. C. Walker, W. Zhang, B. Wang, S. Hayik, A. Roitberg, G. Seabra, K. F. Wong, F. Paesani, X. Wu, S. Brozell, V. Tsui, H. Gohlke, L. Yang, C. Tan, J. Mongan, V. Hornak, G. Cui, P. Beroza, D. H. Mathews, C. Schafmeister, W. S. Ross and P. A. Kollman, *AMBER 9*, University of California: San Francisco, 2006.
5. L. Rosso and I. R. Gould, *J. Comput. Chem.*, 2008, **29**, 24-37.
6. B. Jojart and T. A. Martinek, *J. Comput. Chem.*, 2007, **28**, 2051-2058.
7. S. W. I. Siu, R. Vacha, P. Jungwirth and R. A. Bockmann, *J. Chem. Phys.*, 2008, **128**, 125103.
8. C. I. Bayly, P. Cieplak, W. D. Cornell and P. A. Kollman, *J. Phys. Chem.*, 1993, **97**, 10269-10280.
9. M. J. Frisch, G. W. Trucks, H. B. Schlegel, G. E. Scuseria, M. A. Robb, J. R. Cheeseman, G. Scalmani, V. Barone, B. Mennucci, G. A. Petersson, H. Nakatsuji, M. Caricato, X. Li, H. P. Hratchian, A. F. Izmaylov, J. Bloino, G. Zheng, J. L. Sonnenberg, M. Hada, M. Ehara, K. Toyota, R. Fukuda, J. Hasegawa, M. Ishida, T. Nakajima, Y. Honda, O. Kitao, H. Nakai, T. Vreven, J. A. Montgomery Jr., J. E. Peralta, F. Ogliaro, M. Bearpark, J. J. Heyd, E. Brothers, K. N. Kudin, V. N. Staroverov, R. Kobayashi, J. Normand, K. Raghavachari, A. Rendell, J. C. Burant, S. S. Iyengar, J. Tomasi, M. Cossi, N. Rega, J. M. Millam, M. Klene, J. E. Knox, J. B. Cross, V. Bakken, C. Adamo, J. Jaramillo, R. Gomperts, R. E. Stratmann, O. Yazyev, A. J. Austin, R. Cammi, C. Pomelli, J. W. Ochterski, R. L. Martin, K. Morokuma, V. G. Zakrzewski, G. A. Voth, P. Salvador, J. J. Dannenberg, S. Dapprich, A. D. Daniels, O. Farkas, J. B. Foresman, J. V. Ortiz, J. Cioslowski and D. J. Fox, *Gaussian 09*, Gaussian, Inc.: Wallingford CT, 2009.
10. W. L. Jorgensen, J. Chandrasekhar, J. D. Madura, R. W. Impey and M. L. Klein, *J. Chem. Phys.*, 1983, **79**, 926-935.
11. A. D. Becke, *J. Chem. Phys.*, 1993, **98**, 1372-1377.
12. P. Daněček and P. Bouř, *J. Chem. Phys.*, 2007, **126**, 224513.
13. M. L. Senent, Y. G. Smeyers, R. Dominguez-Gomez and M. Villa, *J. Chem. Phys.*, 2000, **112**, 5809-5819.
14. P. J. Stephens, *J. Phys. Chem.*, 1985, **89**, 748-752.
15. J. R. Cheeseman, M. J. Frisch, F. J. Devlin and P. J. Stephens, *Chem. Phys. Lett.*, 1996, **252**, 211-220.
16. P. J. Stephens, *J. Phys. Chem.*, 1987, **91**, 1712-1715.
17. P. Bouř, J. Sopková, L. Bednárová, P. Maloň and T. A. Keiderling, *J. Comput. Chem.*, 1997, **18**, 646-659.
18. V. Andrushchenko and P. Bouř, *Chirality*, 2010, **22**, E96-E114.
19. V. Andrushchenko, D. Tsankov, M. Krasteva, H. Wieser and P. Bour, *J. Am. Chem. Soc.*, 2011, **133**, 15055-15064.
20. V. Andrushchenko, L. Benda, O. Pav, M. Dracinsky and P. Bour, *J. Phys. Chem. B*, 2015, **119**, 10682-10692.
21. J. M. Martinez and L. Martinez, *J. Comput. Chem.*, 2003, **24**, 819-825.
22. D. R. Gauger, V. V. Andrushchenko, P. Bour and W. Pohle, *Anal. Bioanal. Chem.*, 2010, **398**, 1109-1123.
23. A. Onufriev, D. Bashford and D. A. Case, *Proteins-Structure Function and Bioinformatics*, 2004, **55**, 383-394.
24. G. Sigalov, P. Scheffel and A. Onufriev, *J. Chem. Phys.*, 2005, **122**, 094511.
25. V. Andrushchenko, *Ptraj HBOND*, Prague, 2009.

26. P. Lalanne, J. M. Andanson, J. C. Soetens, T. Tassaing, Y. Danten and M. Besnard, *J. Phys. Chem. A*, 2004, **108**, 3902-3909.
27. M. G. Batishcheva, *Inzhen.-Fiz. Zh.*, 1959, **2**, 101-104.
28. M. Tasumi, T. Shimanouchi, A. Watanabe and R. Goto, *Spectrochimica Acta*, 1964, **20**, 629-666.
29. H. H. Eysel and J. E. Bertie, *J. Mol. Struct.*, 1986, **142**, 227-230.
30. W. Pohle, C. Selle, W. Rettig, U. Heiser, B. Dobner and S. Wartewig, *Arch. Biochem. Biophys.*, 2001, **396**, 151-161.
31. C. J. Pouchert, *The Aldrich Library of FT-IR Spectra*, Aldrich Chem. Co., Inc., Milwaukee, 1 edn., 1985.
32. *Journal*.
33. K. Nakamoto, M. Margoshes and R. E. Rundle, *J. Am. Chem. Soc.*, 1955, **77**, 6480-6486.
34. H. Ratajczak and W. J. Orville-Thomas, *J. Mol. Struct.*, 1968, **1**, 449-461.
